# Supplementary material for: Regulating the stability of 2D crystal structures using an oxidation state-dependent molecular conformation
Source: Royal Society of Chemistry journal article supplement (doi:10.1039/b517668a), 2006-01-01
Supplement: b517668a.pdf [file b517668a.pdf]

# Supplementary Information

## **Regulating the stability of 2D crystal structures using an oxidation state dependent molecular conformation**

Jonathan P. Hill, Yutaka Wakayama, Wolfgang Schmitt, Tohru Tsuruoka, Takashi Nakanishi, Melvin L. Zandler, Amy L. McCarty, Francis D'Souza, Lionel R. Milgrom and Katsuhiko Ariga

1. Experimental details
  - (a) X-ray crystallography
  - (b) Thin film fluorescence measurements.
  - (c) Scanning tunneling microscopy.
2. Molecular orbital calculations.
3. Solid state fluorescence spectra.

## 1. Experimental

**(a) X-ray Crystallography.** Crystals of TDtBHPP suitable for crystallography were grown by slow evaporation of a solution of the porphyrins in a 1:1 mixture of dichloromethane and *n*-hexane. A rhombic block was selected and mounted on a glass fiber using paraffin oil which was then placed in the diffractometer coldstream at 200 K. Data were collected on a Bruker SMART APEX diffractometer using graphite-monochromated MoK $\alpha$  radiation. Refinement was by direct methods using SHELXL-97. TDtBHPP: C<sub>76</sub>H<sub>94</sub>N<sub>4</sub>O<sub>4</sub>·3C<sub>6</sub>H<sub>14</sub>, M = 1386.07 g/mol, crystal size 0.3 x 0.3 x 0.2 mm<sup>3</sup>, colour: purple-red, rhombic block, space group *P*-1, *a* = 10.643(2), *b* = 14.476(3), *c* = 15.377(3) Å,  $\alpha$  = 97.08(3)°,  $\beta$  = 102.40(3)°,  $\gamma$  = 110.63(3)°, *U* = 2113.5(7) Å<sup>3</sup>, *Z* = 1,  $\rho_{\text{calcd}}$  = 1.089 mg/m<sup>3</sup>, 17899 reflections measured, 7878 were unique (Rint. 0.0469); Refinement against *F*<sup>2</sup> to *w*R<sup>2</sup>: 0.1343, R1 = 0.0642 (3903 reflections with *I* > 2 $\sigma$ (*I*)), 606 parameters, 0 restraints. The porphyrin molecule lies on an inversion centre. Additionally, one hexane solvate is inversion disordered and only its position can be determined.

**(b) Thin Film Fluorescence Measurements.** Fluorescence measurements were performed in air on samples evaporated onto glass substrates and using the total internal reflection geometry. Porphyrin and oxidized porphyrin were excited using the 441.6-nm line of a He-Cd laser and the 514.5-nm line of an Ar ion laser, respectively. Laser light was focused onto the glass substrate from the backside using an objective lens with a numerical aperture of 1.45. Light emitted from the sample was collected by the same objective lens, and analyzed using a spectrograph equipped with a liquid-nitrogen-cooled

CCD camera. The spectra are corrected for the energy-dependent sensitivity of the photodetection system.

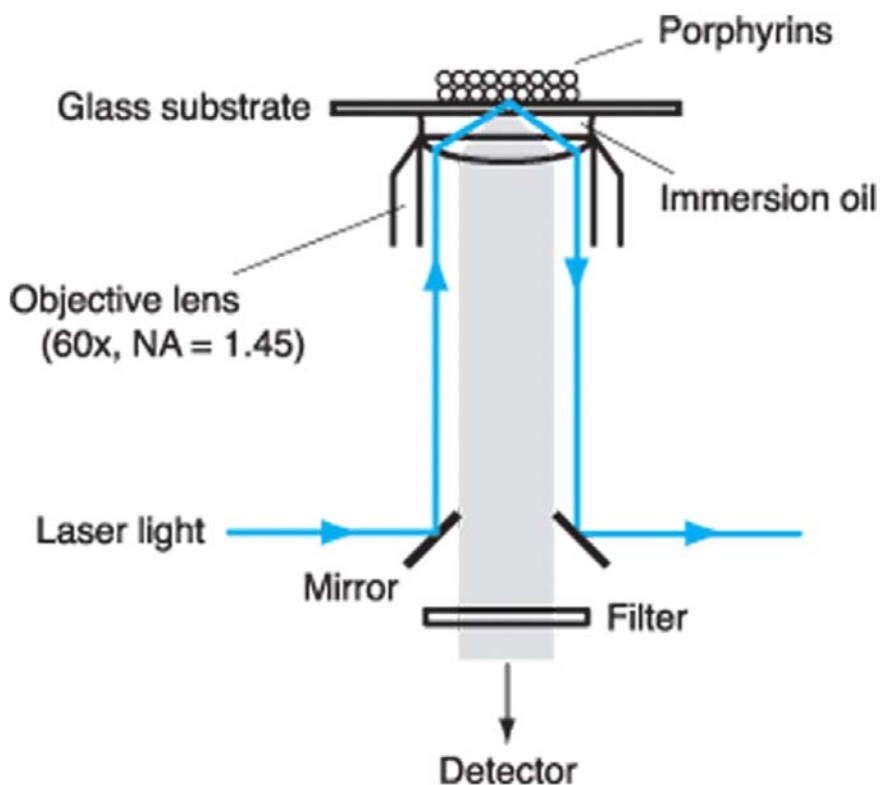

**Fig. S1.** Instrumental geometry used for the solid state fluorescence measurements.

### (c) Scanning Tunneling Microscopy

The atomically clean single crystals of Cu(111) used as substrates were prepared by  $\text{Ar}^+$  sputtering and annealing (700K) cycles. Sub-monolayer coverage of the substrate was assured by sublimation for 10 mins at 320°C from a Knudsen cell to the metal substrate over an intervening distance of 30 cm in ultra-high vacuum ( $1 \times 10^{-8}$  Pa). STM was performed in ultrahigh vacuum.

## 2. Molecular Orbital Calculations

Molecular orbital structures and energies and electrostatic surfaces of the molecules studied were calculated using *Gaussian 03* Revision B.04<sup>S1</sup> and figures generated using Gaussview.

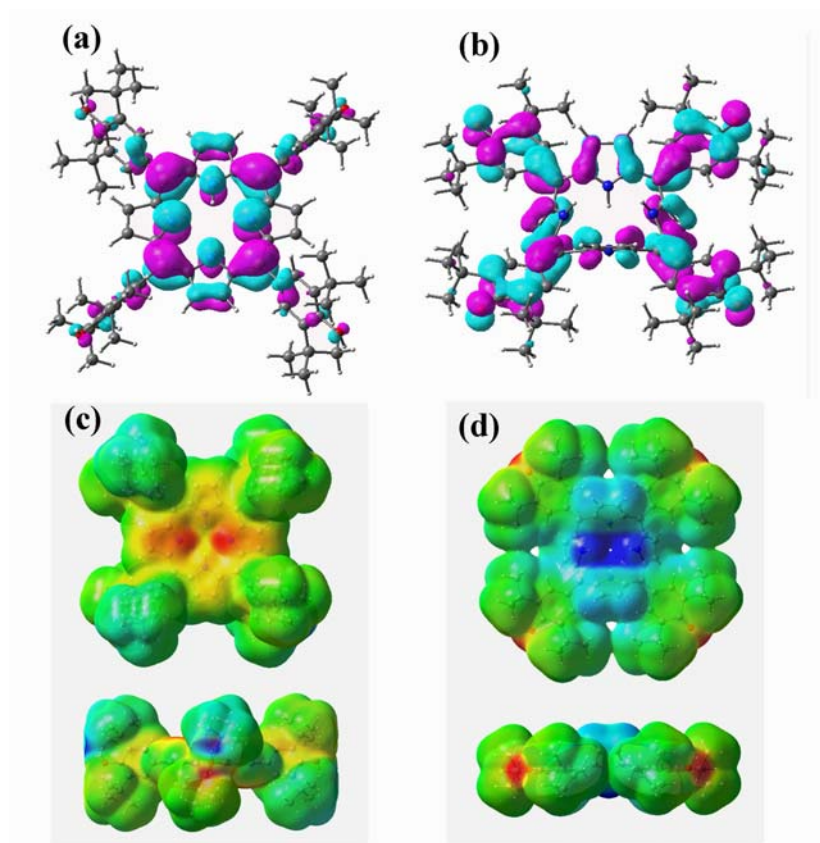

**Fig. S2.** Structures of the highest occupied molecular orbitals (HOMO) of (a) TDtBHPP; (b) Ox(TDtBHPP) calculated at the B3LYP/3-21G(\*) level of density functional theory (DFT). Panels (c) and (d) show the electrostatic surfaces of TDtBHPP and Ox(TDtBHPP), respectively, in plan and side-on elevations. The electrostatic surfaces match closely the morphology of the molecules observed by STM for TDtBHPP, having a large dihedral angle between porphyrin and phenyl substituents, and for Ox(TDtBHPP), where the substituents approach coplanarity.

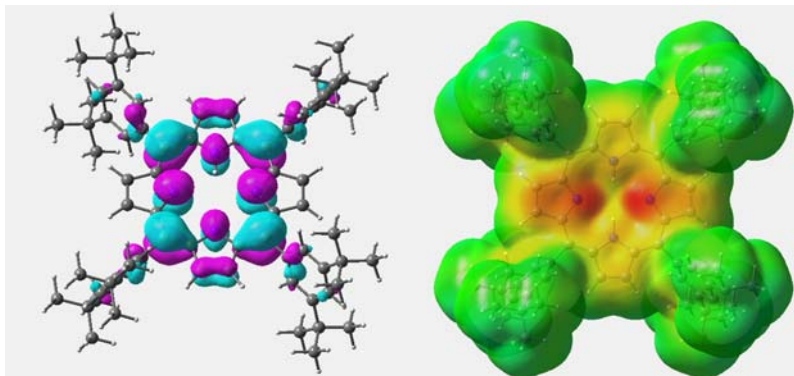

**Fig. S3.** L.H.S. Molecular orbital (HOMO) and R.H.S electrostatic potential surface of 5,10,15,20-tetrakis(3,5-di-t-butylphenyl)porphyrin, the non-phenolic analogue of TDtBHPP.

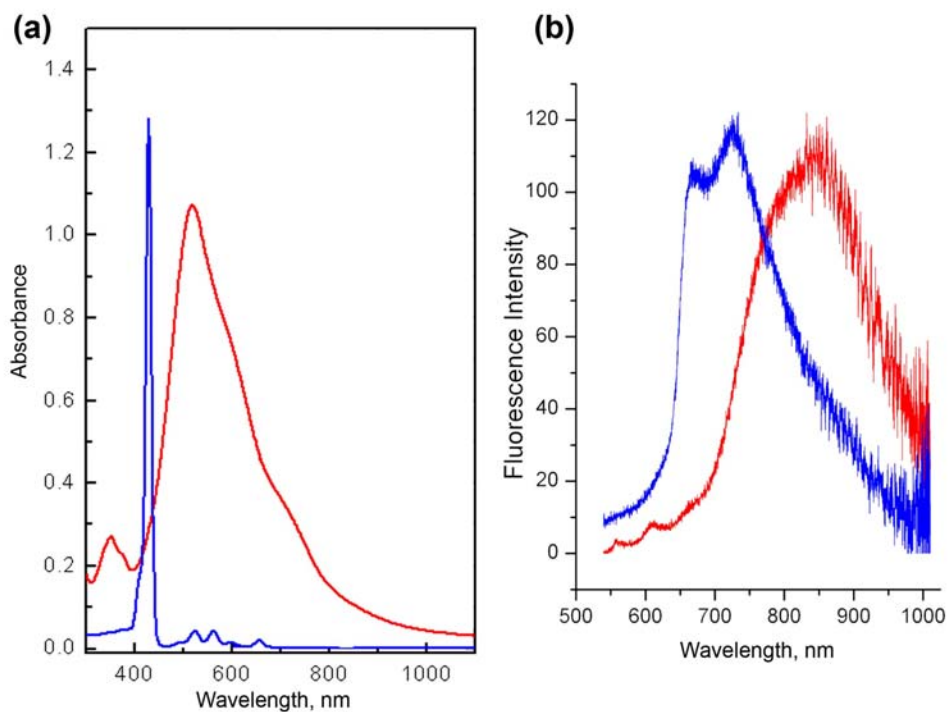

**Fig. S4.** (a) Electronic spectroscopy of TDtBHPP) and Ox(TDtBHPP). UV/Vis and fluorescence emission of TDtBHPP (blue) and Ox(TDtBHPP) (red) measured from 1,2-dichlorobenzene solutions. (b) Fluorescence spectra of multilayer films (2 monolayers approx.) of the compounds after deposition by sublimation onto a glass substrate. TDtBHPP (blue); Ox(TDtBHPP) (red).

References

- S1. *Gaussian 98* (Revision A.9), Frisch, M. J.; Trucks, G. W.; Schlegel, H. B.; Scuseria, G. E.; Robb, M. A.; Cheeseman, J. R.; Zakrzewski, V. G.; Montgomery, J. A.; Stratmann, R. E.; Burant, J. C.; Dapprich, S.; Millam, J. M.; Daniels, A. D.; Kudin, K. N.; Strain, M. C.; Farkas, O.; Tomasi, J.; Barone, V.; Cossi, M.; Cammi, R.; Mennucci, B.; Pomelli, C.; Adamo, C.; Clifford, S.; Ochterski, J.; Petersson, G. A.; Ayala, P. Y.; Cui, Q.; Morokuma, K.; Malick, D. K.; Rabuck, A. D.; Raghavachari, K.; Foresman, J. B.; Cioslowski, J.; Ortiz, J. V.; Stefanov, B. B.; Liu, G.; Liashenko, A.; Piskorz, P.; Komaromi, I.; Gomperts, R.; Martin, R. L.; Fox, D. J.; Keith, T.; Al-Laham, M. A.; Peng, C. Y.; Nanayakkara, A.; Gonzalez, C.; Challacombe, M.; Gill, P. M. W.; Johnson, B. G.; Chen, W.; Wong, M. W.; Andres, J. L.; Head-Gordon, M.; Replogle, E. S.; Pople, J. A. Gaussian, Inc., Pittsburgh PA, 1998.
